# Supplementary material
Source: PubMed Central journal article supplement (PMC5961083)
Supplement: ddy078_supplemental_data.pdf [file ddy078_supplemental_data.pdf]

Table S1

| Duplication break points | Cardiovascular defect                                                 | Classification | Sex    | Inherited          | Reference        |
|--------------------------|-----------------------------------------------------------------------|----------------|--------|--------------------|------------------|
| A-D                      | TOF                                                                   | OFT            | Male   | Unknown            | CHOP             |
| A-D                      | TOF                                                                   | OFT            | Female | Inherited (mother) |                  |
| A-D                      | PTA                                                                   | OFT            | Female | De novo            | N=24             |
| A-D                      | HLHS                                                                  | HLHS           | Male   | Inherited (father) |                  |
| A-D                      | HLHS                                                                  | HLHS           | Female | Inherited (mother) |                  |
| A-D                      | ASD                                                                   | ASD            | Female | Inherited (father) |                  |
| A-D                      | ASD                                                                   | ASD            | Male   | De novo            |                  |
| A-D                      | ASD                                                                   | ASD            | Male   | Inherited (mother) |                  |
| A-D                      | VSD                                                                   | OFT            | Male   | Inherited (father) |                  |
| A-D                      | VSD                                                                   | OFT            | Male   | Unknown            |                  |
| A-D                      | VSD                                                                   | OFT            | Male   | Inherited (mother) |                  |
| A-D                      | ASD and VSD                                                           | OFT/ASD        | Male   | Unknown            |                  |
| A-D                      | ASD and VSD                                                           | OFT/ASD        | Female | Unknown            |                  |
| A-D                      | TAPVC with ASD                                                        | ASD            | Male   | De novo            |                  |
| A-D                      | TAPVC with ASD                                                        | ASD            | Male   | Unknown            |                  |
| A-D                      | PV stenosis                                                           | OFT            | Female | Unknown            |                  |
| A-D                      | PV stenosis                                                           | OFT            | Male   | De novo            |                  |
| A-B                      | ASD                                                                   | ASD            | Male   | Inherited (mother) |                  |
| A-B                      | ASD                                                                   | ASD            | Female | Unknown            |                  |
| FISH                     | PFO with PA stenosis                                                  | OFT            | Female | Inherited (father) |                  |
| FISH                     | PV stenosis                                                           | OFT            | Female | Unknown            |                  |
| FISH                     | PV stenosis                                                           | OFT            | Male   | Inherited (father) |                  |
| FISH                     | TOF                                                                   | OFT            | Female | Unknown            |                  |
| FISH                     | VSD                                                                   | OFT            | Male   | Unknown            |                  |
| A-D                      | PTA                                                                   | OFT            | Female | De novo            | 26297018         |
| A-D                      | VSD                                                                   | OFT            | Female | Inherited (father) |                  |
| A-D                      | ASD                                                                   | ASD            | Female | De novo            | 16490798         |
| A-D                      | PTA                                                                   | OFT            | Female | Inherited (father) |                  |
| A-B                      | Right aortic arch                                                     | OFT            | N/A    | Inherited (father) | 25118001         |
| A-B                      | TGA + VSD                                                             | OFT            | N/A    | Inherited (father) |                  |
| A-C                      | HLHS                                                                  | HLHS           | N/A    | Unknown            | N=26 total cases |
| A-D                      | HLHS                                                                  | HLHS           | N/A    | Inherited (mother) |                  |
| A-D                      | PV stenosis + VSD                                                     | OFT            | N/A    | Unknown            |                  |
| A-D                      | OFT does not specify                                                  | OFT            | N/A    | Unknown            | 24098474         |
| A-D                      | OFT does not specify                                                  | OFT            | N/A    | Unknown            |                  |
| A-D                      | OFT does not specify                                                  | OFT            | N/A    | Unknown            |                  |
| A-D                      | PTA, VSD, tricuspid atresia, IAA                                      | OFT            | Female | Inherited (mother) | 21473936         |
| A-D                      | DORV +HLHS+ ASD                                                       | HLHS, OFT, ASD | Female | Inherited (father) | 16761289 n=3     |
| A-D                      | ASD                                                                   | ASD            | Female | Inherited (father) | 23159380         |
| A-D                      | VSD                                                                   | OFT            | Female | Inherited (mother) | 18076674 n=8     |
| A-B                      | PTA                                                                   | OFT            | Male   | Inherited (mother) | 23059467         |
| A-C                      | HLHS + PV stenosis                                                    | HLHS, OFT      | Female | De novo            | 24451223         |
| A-C                      | Aorta hypoplasia + VSD                                                | OFT            | N/A    | Inherited          | 26715944         |
| 1.4 MB include Tbx1      | VSD                                                                   | OFT            | N/A    | Inherited (father) | 26625662         |
| A-D                      | ASD                                                                   | ASD            | Female | De novo            | 25376777         |
| A-D                      | Complex CHD                                                           |                | Male   | Unknown            | 21849782         |
| A-D                      | PTA                                                                   | OFT            | N/A    | Inherited (father) | 17384091         |
| FISH p250 kit            | TGA                                                                   | OFT            | Male   | De novo            | 25387403         |
| FISH TUPLE1              | TGA + VSD                                                             | OFT            | Male   | Inherited (father) | 21199755         |
| FISH TUPLE1              | TOF                                                                   | OFT            | Male   | Unknown            | 14526392         |
| FISH TUPLE1              | HLHS + IAA                                                            | HLHS           | Male   | Unknown            | N=13             |
| FISH TUPLE1              | TGA                                                                   | OFT            | Female | Inherited (mother) |                  |
| FISH TUPLE1              | chronic aortic regurgitation, mild mitral and tricuspid regurgitation | Valve defect   | Male   | Inherited (father) | 15099348         |
| FISH                     | Mitral valve defect                                                   | Valve defect   | Female | Inherited (father) | 17455106         |
| FISH TUPLE1              | TOF                                                                   | OFT            | Female | Inherited (father) | 15845171         |
| FISH TUPLE1              | HLHS                                                                  | HLHS           | Male   | De novo            |                  |
| FISH TUPLE1              | TOF                                                                   | OFT            | Female | Unknown            | 15800846 n=7     |
| FISH TUPLE1              | HLHS                                                                  | HLHS           | Male   | Unknown            |                  |

**Table S1. Detailed information of all individuals found with *TBX1* included in duplication break points.** Type of duplication, cardiac defect and category of the CHD, sex and inheritance (when these information was available). Human LCR22-A-D duplication is indicated as A-D; LCR22-A-B duplication is indicated as A-B; LCR22A to LCR22C is indicated as A-C. *TBX1* lies between duplicated region A-B and is among the duplicated region in each of these listed cases. Abbreviations: Tetralogy of Fallot (TOF); persistent truncus arteriosus (PTA); hypoplastic left heart syndrome (HLHS); atrial septal defect (ASD); ventricular septum defect (VSD); pulmonary valve (PV); pulmonary artery (PA); transposition of great arteries (TGA); double outlet right ventricle (DORV); interrupted aortic arch (IAA); total anomalous pulmonary venous connection (TAPVC); patent foramen ovale (PFO); outflow tract (OFT).
